# Supplementary material for: Immunoaffinity-free chromatographic purification of ovarian cancer biomarker CA125 (MUC16) from blood serum enables mass spectrometry characterization
Source: Royal Society of Chemistry journal article supplement (doi:10.1039/d4ay01172d), 2024-01-01
Supplement: d4ay01172d1.pdf [file d4ay01172d1.pdf]

*ESI document S1 for Schuster-Little et al.: "Immunoaffinity-free chromatographic purification of ovarian cancer biomarker CA125 (MUC16) from blood serum enables mass spectrometry characterization"*

### *Description of error propagation methods*

The measured values from CA125 ELISA and protein BCA assays are absorbances. From these absorbance values, concentrations are inferred using a quadratic polynomial to fit the calibration data. Uncertainties in these concentrations were determined from average absorbance values using a method found in the Engineering Statistics Handbook published by the National Institutes of Standards and Technology (<https://www.itl.nist.gov/div898/handbook/mpc/section3/mpc3671.htm>, accessed 6/19/2024). Specifically, for a polynomial function of the form

$$Y = a + bX + cX^2 \quad (\text{Equation 1})$$

the quadratic formula can be written

$$X' = \frac{-b \pm \sqrt{b^2 - 4c(a - Y')}}{2a} \quad (\text{Equation 2})$$

where  $X'$  is a calibrated value (concentration in this case) and  $Y'$  is a measured value (absorbance in this case).

The uncertainty in  $X'$  (denoted  $u$ ) is calculated from partial derivatives and the variance ( $u^2$ ) as follows:

$$\frac{\partial X'}{\partial Y'} = \frac{1}{\sqrt{b^2 - 4c(a - Y')}} \quad (\text{Equation 3})$$

$$\frac{\partial X'}{\partial a'} = \frac{-1}{\sqrt{b^2 - 4c(a - Y')}} \quad (\text{Equation 4})$$

$$\frac{\partial X'}{\partial b} = \frac{-1 + \frac{b}{\sqrt{b^2 - 4c(a - Y')}}}{2c} \quad (\text{Equation 5})$$

$$\frac{\partial X'}{\partial c} = \frac{-a + Y'}{c\sqrt{b^2 - 4c(a - Y')}} - \frac{-b + \sqrt{b^2 - 4c(a - Y')}}{2c} \quad (\text{Equation 6})$$

$$u^2 = \left(\frac{\partial X'}{\partial Y'}\right)^2 (s_y)^2 + \left(\frac{\partial X'}{\partial a'}\right)^2 (s_a)^2 + \left(\frac{\partial X'}{\partial b}\right)^2 (s_b)^2 + \left(\frac{\partial X'}{\partial c}\right)^2 (s_c)^2 \quad (\text{Equation 7})$$

$$u = \sqrt{\left(\frac{\partial X'}{\partial Y'}\right)^2 (s_y)^2 + \left(\frac{\partial X'}{\partial a'}\right)^2 (s_a)^2 + \left(\frac{\partial X'}{\partial b'}\right)^2 (s_b)^2 + \left(\frac{\partial X'}{\partial c'}\right)^2 (s_c)^2} \quad (\text{Equation 8})$$
