# Supplementary material for: Immunoaffinity-free chromatographic purification of ovarian cancer biomarker CA125 (MUC16) from blood serum enables mass spectrometry characterization
Source: Royal Society of Chemistry journal article supplement (doi:10.1039/d4ay01172d), 2024-01-01

*ESI Figure S1 for Schuster-Little et al.: "Immunoaffinity-free chromatographic purification of ovarian cancer biomarker CA125 (MUC16) from blood serum enables mass spectrometry characterization"*

**ESI Figure S1.** Venn diagrams comparing MUC16 peptides detected through bottom-up proteomics analysis of samples enriched through SEC alone and through SEC and top-14 protein depletion. Peptides detected in samples enriched through SEC are labeled as SEC Only (red regions of the diagram). Peptides detected in samples enriched through SEC and top-14 depletion are labeled as SEC + DEP Only (blue regions of the diagram). Peptides common to both samples are labeled as Shared (purple regions of the diagram). Samples were prepared with CA125 concentrations ranging from 30 U/mL to 30,000 U/mL. The results of two biological replicates are shown.

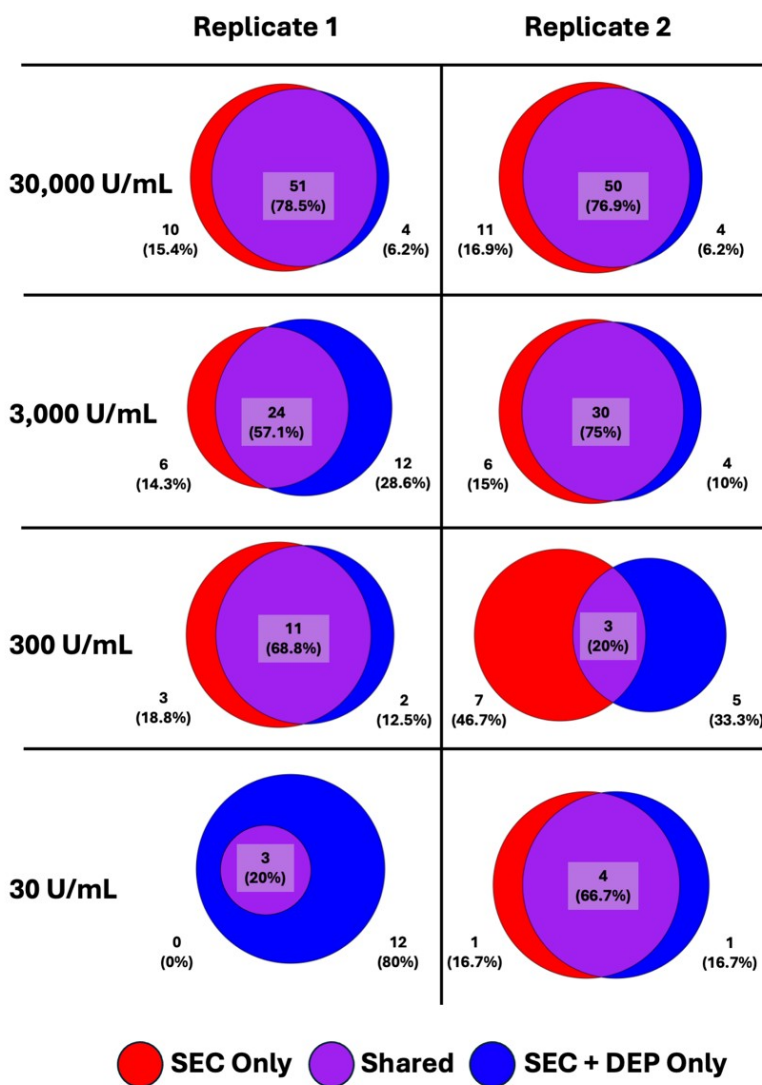

Supplement: d4ay01172d2.pdf [file d4ay01172d2.pdf]
