# Supplementary material for: Immunoaffinity-free chromatographic purification of ovarian cancer biomarker CA125 (MUC16) from blood serum enables mass spectrometry characterization
Source: Royal Society of Chemistry journal article supplement (doi:10.1039/d4ay01172d), 2024-01-01
Supplement: d4ay01172d3.pdf [file d4ay01172d3.pdf]

*ESI Table S1 for Schuster-Little et al.: "Immunoaffinity-free chromatographic purification of ovarian cancer biomarker CA125 (MUC16) from blood serum enables mass spectrometry characterization"*

**ESI Table S1.** Summary of CA125 and total protein concentrations, CA125 purity, fold enrichment from the initial sample, and percent of CA125 and protein recovered from samples with varied concentrations of CA125 spiked into plasma-derived serum and enriched using SEC.

| Sample   | CA125 Concentration (U/mL) | Protein Concentration (mg/mL) | CA125 Purity (U/mL) | Purity Fold Increase from Feed | Percent Recovery CA125 | Percent Recovery Protein |
|----------|----------------------------|-------------------------------|---------------------|--------------------------------|------------------------|--------------------------|
| A – Feed | 26000 ± 4000               | 42.2 ± 1.9                    | 520 ± 80            |                                |                        |                          |
| A – Pool | 7900 ± 1100                | 0.224 ± 0.013                 | 35000 ± 5000        | 68 ± 18                        | 56 ± 11                | 0.82 ± 0.06              |
| B – Feed | 2400 ± 300                 | 41.8 ± 1.7                    | 57 ± 8              |                                |                        |                          |
| B – Pool | 870 ± 150                  | 0.208 ± 0.012                 | 4200 ± 800          | 75 ± 18                        | 66 ± 15                | 0.89 ± 0.06              |
| C – Feed | 620 ± 120                  | 42.1 ± 1.7                    | 15 ± 3              |                                |                        |                          |
| C – Pool | 180 ± 40                   | 0.220 ± 0.014                 | 810 ± 180           | 55 ± 16                        | 51 ± 14                | 0.93 ± 0.07              |
| D – Feed | 200 ± 30                   | 46 ± 3                        | 4 ± 1               |                                |                        |                          |
| D – Pool | 100 ± 20                   | 0.227 ± 0.016                 | 500 ± 100           | 110 ± 30                       | 90 ± 20                | 0.87 ± 0.08              |
