# Supplementary material for: Immunoaffinity-free chromatographic purification of ovarian cancer biomarker CA125 (MUC16) from blood serum enables mass spectrometry characterization
Source: Royal Society of Chemistry journal article supplement (doi:10.1039/d4ay01172d), 2024-01-01
Supplement: d4ay01172d4.pdf [file d4ay01172d4.pdf]

*ESI Table S3 for Schuster-Little et al.: “Immunoaffinity-free chromatographic purification of ovarian cancer biomarker CA125 (MUC16) from blood serum enables mass spectrometry characterization”*

**ESI Table S3.** Comparison of CA125 counts obtained from a research-grade immunoassay (reported as mean  $\pm$  standard deviation,  $n = 3$ ) and a clinical immunoassay for samples analyzed in the study.

| Sample ID | Location in Paper | Sample (In Paper) | Research Grade Value (U/mL) | Clinical Test Value (U/mL) |
|-----------|-------------------|-------------------|-----------------------------|----------------------------|
| 1F        | Table 3           | 30 U/mL Feed      | 38 $\pm$ 4                  | 194                        |
| 1P        | Table 3           | 30 U/mL Pool      | 32 $\pm$ 3                  | 20                         |
| 2F        | Table 3           | 300 U/mL Feed     | 160 $\pm$ 15                | 338                        |
| 2P        | Table 3           | 300 U/mL Pool     | 185 $\pm$ 8                 | 170                        |
| 3F        | Table 3           | 3000 U/mL Feed    | 3080 $\pm$ 180              | 3132                       |
| 3P        | Table 3           | 3000 U/mL Pool    | 1780 $\pm$ 90               | 1633                       |
| 4F        | Table 1           | 1 – Feed          | 1500 $\pm$ 200              | 2383                       |
| 4P        | Table 1           | 1 – Pool          | 480 $\pm$ 70                | 780                        |
| 5F        | Table 1           | 2 – Feed          | 60 $\pm$ 12                 | 71                         |
| 5P        | Table 1           | 2 – Pool          | 20 $\pm$ 11                 | 17                         |
| 6F        | Table 1           | 3 – Feed          | 9000 $\pm$ 2000             | >10,000                    |
| 6P        | Table 1           | 3 – Pool          | 3800 $\pm$ 700              | >10,000                    |
| 7F        | Table 1           | 4 – Feed          | 5700 $\pm$ 1600             | >10,000                    |
| 7P        | Table 1           | 4 – Pool          | 5000 $\pm$ 1000             | >10,000                    |
| 8F        | Table 1           | 5 – Feed          | 7000 $\pm$ 2000             | >10,000                    |
| 8P        | Table 1           | 5 – Pool          | 3400 $\pm$ 700              | 7885                       |
