# Supplementary material for: Immunoaffinity-free chromatographic purification of ovarian cancer biomarker CA125 (MUC16) from blood serum enables mass spectrometry characterization
Source: Royal Society of Chemistry journal article supplement (doi:10.1039/d4ay01172d), 2024-01-01
Supplement: d4ay01172d5.pdf [file d4ay01172d5.pdf]

**Proteins with MW less than 100 kDa**

14-3-3 protein beta/alpha [Homo sapiens]  
14-3-3 protein epsilon [Homo sapiens]  
14-3-3 protein eta [Homo sapiens]  
14-3-3 protein gamma [Homo sapiens]  
14-3-3 protein sigma [Homo sapiens]  
14-3-3 protein theta [Homo sapiens]  
14-3-3 protein zeta/delta isoform X1 [Homo sapiens]  
26S proteasome non-ATPase regulatory subunit 13 isoform 1 [Homo sapiens]  
26S proteasome non-ATPase regulatory subunit 3 [Homo sapiens]  
26S proteasome non-ATPase regulatory subunit 5 isoform 1 [Homo sapiens]  
26S proteasome regulatory subunit 7 isoform 1 [Homo sapiens]  
40S ribosomal protein S18 [Homo sapiens]  
40S ribosomal protein S2 [Homo sapiens]  
40S ribosomal protein S3 isoform 2 [Homo sapiens]  
40S ribosomal protein S3a isoform 1 [Homo sapiens]  
40S ribosomal protein S4, X isoform [Homo sapiens]  
4F2 cell-surface antigen heavy chain isoform b [Homo sapiens]  
6-phosphogluconate dehydrogenase, decarboxylating isoform 1 [Homo sapiens]  
60S acidic ribosomal protein P0 [Homo sapiens]  
60S ribosomal protein L10a [Homo sapiens]  
60S ribosomal protein L5 [Homo sapiens]  
actin-related protein 2 isoform a [Homo sapiens]  
actin-related protein 2 isoform b [Homo sapiens]  
actin-related protein 2/3 complex subunit 2 [Homo sapiens]  
actin-related protein 3 isoform 1 [Homo sapiens]  
actin, alpha skeletal muscle [Homo sapiens]  
actin, cytoplasmic 1 [Homo sapiens]  
activator of 90 kDa heat shock protein ATPase homolog 1 isoform 1 [Homo sapiens]  
adenosylhomocysteinase isoform X1 [Homo sapiens]  
adipocyte plasma membrane-associated protein [Homo sapiens]  
adiponectin precursor [Homo sapiens]  
ADP-ribosylation factor 1 [Homo sapiens]  
afamin precursor [Homo sapiens]  
aldehyde dehydrogenase 1A1 [Homo sapiens]  
aldehyde dehydrogenase family 16 member A1 isoform 1 [Homo sapiens]  
alpha-1-acid glycoprotein 1 precursor [Homo sapiens]  
alpha-1-acid glycoprotein 2 precursor [Homo sapiens]  
alpha-1-antichymotrypsin precursor [Homo sapiens]  
alpha-1-antitrypsin isoform X1 [Homo sapiens]  
alpha-1B-glycoprotein precursor [Homo sapiens]  
alpha-2-antiplasmin isoform X2 [Homo sapiens]  
alpha-2-HS-glycoprotein isoform 1 preproprotein [Homo sapiens]  
alpha-aminoadipic semialdehyde dehydrogenase isoform 1 precursor [Homo sapiens]  
alpha-centractin [Homo sapiens]  
alpha-enolase isoform 1 [Homo sapiens]  
aminopeptidase B isoform a [Homo sapiens]  
angiotensinogen precursor [Homo sapiens]  
annexin A1 isoform X1 [Homo sapiens]  
annexin A11 isoform X1 [Homo sapiens]  
annexin A2 isoform 1 [Homo sapiens]  
annexin A5 [Homo sapiens]  
annexin A7 isoform X1 [Homo sapiens]  
antithrombin-III isoform 3 precursor [Homo sapiens]  
apolipoprotein A-I isoform X1 [Homo sapiens]  
apolipoprotein A-II preproprotein [Homo sapiens]  
apolipoprotein A-IV precursor [Homo sapiens]  
apolipoprotein A-V precursor [Homo sapiens]  
apolipoprotein C-I isoform a precursor [Homo sapiens]  
apolipoprotein C-II precursor [Homo sapiens]  
apolipoprotein C-III precursor [Homo sapiens]  
apolipoprotein C-IV precursor [Homo sapiens]

apolipoprotein D precursor [Homo sapiens]  
apolipoprotein E isoform a precursor [Homo sapiens]  
apolipoprotein F preproprotein [Homo sapiens]  
apolipoprotein L1 isoform b precursor [Homo sapiens]  
apolipoprotein M isoform 1 [Homo sapiens]  
apolipoprotein M isoform 2 [Homo sapiens]  
argininosuccinate synthase [Homo sapiens]  
aspartyl aminopeptidase isoform a [Homo sapiens]  
ATP synthase subunit beta, mitochondrial precursor [Homo sapiens]  
barrier-to-autointegration factor isoform X1 [Homo sapiens]  
basigin isoform 1 precursor [Homo sapiens]  
beta-2-glycoprotein 1 precursor [Homo sapiens]  
beta-actin-like protein 2 [Homo sapiens]  
beta-Ala-His dipeptidase precursor [Homo sapiens]  
bone morphogenetic protein 7 preproprotein [Homo sapiens]  
BTB/POZ domain-containing protein KCTD12 [Homo sapiens]  
C4b-binding protein alpha chain isoform X1 [Homo sapiens]  
C4b-binding protein beta chain isoform X1 [Homo sapiens]  
calmodulin-like protein 5 [Homo sapiens]  
calpain-1 catalytic subunit isoform X1 [Homo sapiens]  
carbonic anhydrase 2 isoform 1 [Homo sapiens]  
carbonyl reductase [NADPH] 1 isoform 1 [Homo sapiens]  
carboxypeptidase M precursor [Homo sapiens]  
carboxypeptidase N subunit 2 isoform X1 [Homo sapiens]  
cartilage oligomeric matrix protein precursor [Homo sapiens]  
catenin alpha-1 isoform 1 [Homo sapiens]  
catenin beta-1 isoform X1 [Homo sapiens]  
cathelicidin antimicrobial peptide preproprotein [Homo sapiens]  
cathepsin D preproprotein [Homo sapiens]  
CD5 antigen-like isoform 1 precursor [Homo sapiens]  
CD5 antigen-like isoform X1 [Homo sapiens]  
CD59 glycoprotein preproprotein [Homo sapiens]  
CD81 antigen isoform X1 [Homo sapiens]  
CD82 antigen isoform X1 [Homo sapiens]  
CD9 antigen isoform 1 [Homo sapiens]  
cell division control protein 42 homolog isoform 1 precursor [Homo sapiens]  
cellular retinoic acid-binding protein 2 [Homo sapiens]  
chloride intracellular channel protein 1 [Homo sapiens]  
chloride intracellular channel protein 4 [Homo sapiens]  
cholesteryl ester transfer protein isoform 1 precursor [Homo sapiens]  
citrate synthase, mitochondrial precursor [Homo sapiens]  
clathrin light chain A isoform a [Homo sapiens]  
claudin-3 [Homo sapiens]  
claudin-6 precursor [Homo sapiens]  
clusterin preproprotein [Homo sapiens]  
coagulation factor IX isoform 1 preproprotein [Homo sapiens]  
coagulation factor XII preproprotein [Homo sapiens]  
cofilin-1 [Homo sapiens]  
collagen alpha-2(VI) chain isoform 2C2a precursor [Homo sapiens]  
collectin-10 isoform 1 precursor [Homo sapiens]  
collectin-11 isoform f precursor [Homo sapiens]  
complement C1q subcomponent subunit A precursor [Homo sapiens]  
complement C1q subcomponent subunit B isoform 1 precursor [Homo sapiens]  
complement C1q subcomponent subunit C isoform 1 precursor [Homo sapiens]  
complement C1r subcomponent isoform 2 preproprotein [Homo sapiens]  
complement C1r subcomponent-like protein isoform 1 precursor [Homo sapiens]  
complement C1s subcomponent isoform 1 preproprotein [Homo sapiens]  
complement component 1 Q subcomponent-binding protein, mitochondrial precursor [Homo sapiens]  
complement component C7 precursor [Homo sapiens]  
complement component C8 alpha chain preproprotein [Homo sapiens]  
complement component C8 beta chain isoform 1 preproprotein [Homo sapiens]  
complement component C8 gamma chain precursor [Homo sapiens]

complement component C9 preproprotein [Homo sapiens]  
complement factor B preproprotein [Homo sapiens]  
complement factor H-related protein 1 isoform 1 precursor [Homo sapiens]  
complement factor H-related protein 3 isoform 1 precursor [Homo sapiens]  
complement factor H-related protein 4 isoform 1 precursor [Homo sapiens]  
complement factor H-related protein 4 isoform X2 [Homo sapiens]  
complement factor H-related protein 5 isoform X1 [Homo sapiens]  
copine-1 isoform b [Homo sapiens]  
core histone macro-H2A.1 isoform 3 [Homo sapiens]  
core histone macro-H2A.2 [Homo sapiens]  
cornulin [Homo sapiens]  
coronin-1C isoform a [Homo sapiens]  
cystatin-B [Homo sapiens]  
cystatin-SN precursor [Homo sapiens]  
cysteine-rich protein 2 isoform 2 [Homo sapiens]  
D-3-phosphoglycerate dehydrogenase isoform X1 [Homo sapiens]  
disintegrin and metalloproteinase domain-containing protein 10 isoform 1 preproprotein [Homo sapiens]  
DNA topoisomerase 1 [Homo sapiens]  
DNA-(apurinic or apyrimidinic site) endonuclease [Homo sapiens]  
EH domain-containing protein 1 isoform 2 [Homo sapiens]  
elongation factor 1-alpha 1 [Homo sapiens]  
elongation factor 1-alpha 2 [Homo sapiens]  
elongation factor 1-gamma [Homo sapiens]  
elongation factor 2 [Homo sapiens]  
epithelial cell adhesion molecule precursor [Homo sapiens]  
eukaryotic initiation factor 4A-I isoform 1 [Homo sapiens]  
eukaryotic initiation factor 4A-II [Homo sapiens]  
eukaryotic initiation factor 4A-III [Homo sapiens]  
eukaryotic translation initiation factor 2 subunit 3 [Homo sapiens]  
eukaryotic translation initiation factor 2 subunit 3B isoform 1 [Homo sapiens]  
eukaryotic translation initiation factor 3 subunit I isoform 1 [Homo sapiens]  
eukaryotic translation initiation factor 3 subunit L isoform 1 [Homo sapiens]  
eukaryotic translation initiation factor 6 isoform a [Homo sapiens]  
extracellular matrix protein 1 isoform 3 precursor [Homo sapiens]  
ezrin [Homo sapiens]  
fatty acid-binding protein 5 [Homo sapiens]  
fermitin family homolog 3 long isoform [Homo sapiens]  
fibrinogen alpha chain isoform alpha-E preproprotein [Homo sapiens]  
fibrinogen beta chain isoform 1 preproprotein [Homo sapiens]  
fibrinogen gamma chain isoform gamma-B precursor [Homo sapiens]  
fibulin-1 isoform C precursor [Homo sapiens]  
fibulin-1 isoform D precursor [Homo sapiens]  
ficolin-2 isoform a precursor [Homo sapiens]  
ficolin-3 isoform 1 precursor [Homo sapiens]  
fructose-bisphosphate aldolase A isoform 2 [Homo sapiens]  
fructose-bisphosphate aldolase C isoform X1 [Homo sapiens]  
G-protein coupled receptor family C group 5 member C isoform X1 [Homo sapiens]  
galectin-3-binding protein precursor [Homo sapiens]  
galectin-7 [Homo sapiens]  
gelsolin isoform a precursor [Homo sapiens]  
glucose 1,6-bisphosphate synthase isoform X1 [Homo sapiens]  
glucose-6-phosphate isomerase isoform X1 [Homo sapiens]  
glutamate dehydrogenase 1, mitochondrial isoform a precursor [Homo sapiens]  
glutathione S-transferase P [Homo sapiens]  
glyceraldehyde-3-phosphate dehydrogenase isoform 1 [Homo sapiens]  
glycogen phosphorylase, brain form [Homo sapiens]  
glycogen phosphorylase, liver form isoform 1 [Homo sapiens]  
glypican-4 precursor [Homo sapiens]  
GMP synthase [glutamine-hydrolyzing] isoform X1 [Homo sapiens]  
GTP-binding nuclear protein Ran isoform 1 [Homo sapiens]  
guanine nucleotide-binding protein G(i) subunit alpha-2 isoform X1 [Homo sapiens]  
guanine nucleotide-binding protein G(i) subunit alpha-3 [Homo sapiens]

guanine nucleotide-binding protein G(I)/G(S)/G(T) subunit beta-1 isoform X1 [Homo sapiens]  
guanine nucleotide-binding protein G(I)/G(S)/G(T) subunit beta-2 [Homo sapiens]  
haptoglobin isoform 1 preproprotein [Homo sapiens]  
haptoglobin-related protein isoform X1 [Homo sapiens]  
heat shock 70 kDa protein 1B [Homo sapiens]  
heat shock 70 kDa protein 4 [Homo sapiens]  
heat shock 70 kDa protein 6 [Homo sapiens]  
heat shock cognate 71 kDa protein isoform X1 [Homo sapiens]  
heat shock protein beta-1 [Homo sapiens]  
heat shock protein HSP 90-alpha isoform 1 [Homo sapiens]  
heat shock protein HSP 90-beta isoform a [Homo sapiens]  
hemoglobin subunit alpha [Homo sapiens]  
hemoglobin subunit beta [Homo sapiens]  
hemoglobin subunit delta [Homo sapiens]  
hemopexin precursor [Homo sapiens]  
heparin cofactor 2 precursor [Homo sapiens]  
hepatocyte growth factor activator isoform 1 preproprotein [Homo sapiens]  
heterogeneous nuclear ribonucleoprotein D0 isoform a [Homo sapiens]  
heterogeneous nuclear ribonucleoprotein K isoform X1 [Homo sapiens]  
heterogeneous nuclear ribonucleoprotein R isoform X1 [Homo sapiens]  
heterogeneous nuclear ribonucleoprotein U isoform a [Homo sapiens]  
high mobility group protein B1 isoform X1 [Homo sapiens]  
high mobility group protein B2 [Homo sapiens]  
high mobility group protein B3 isoform X1 [Homo sapiens]  
histidine-rich glycoprotein isoform X1 [Homo sapiens]  
histone deacetylase 1 [Homo sapiens]  
histone deacetylase 2 [Homo sapiens]  
histone H1.3 [Homo sapiens]  
histone H2A type 1-C [Homo sapiens]  
histone H2A type 2-A [Homo sapiens]  
histone H2A.Z [Homo sapiens]  
histone H2AX [Homo sapiens]  
histone H2B type 1-O [Homo sapiens]  
histone H2B type 2-F isoform b [Homo sapiens]  
histone H3.1 [Homo sapiens]  
histone H3.2 [Homo sapiens]  
histone H3.3 [Homo sapiens]  
histone H4 isoform X1 [Homo sapiens]  
HLA class I histocompatibility antigen, A alpha chain isoform X2 [Homo sapiens]  
hyaluronan-binding protein 2 isoform 1 preproprotein [Homo sapiens]  
immunoglobulin heavy variable 4-38-2-like [Homo sapiens]  
immunoglobulin lambda-like polypeptide 5 isoform 1 [Homo sapiens]  
immunoglobulin superfamily member 8 isoform X1 [Homo sapiens]  
importin subunit beta-1 isoform 1 [Homo sapiens]  
inorganic pyrophosphatase [Homo sapiens]  
insulin-like growth factor-binding protein complex acid labile subunit isoform 1 precursor [Homo sapiens]  
integrin beta-1 isoform 1A precursor [Homo sapiens]  
integrin beta-1 isoform 1D precursor [Homo sapiens]  
integrin beta-3 precursor [Homo sapiens]  
inter-alpha-trypsin inhibitor heavy chain H1 isoform b [Homo sapiens]  
isocitrate dehydrogenase [NADP] cytoplasmic [Homo sapiens]  
junction plakoglobin isoform X1 [Homo sapiens]  
junction plakoglobin isoform X2 [Homo sapiens]  
kallistatin isoform 1 [Homo sapiens]  
kininogen-1 isoform 1 precursor [Homo sapiens]  
kininogen-1 isoform 2 precursor [Homo sapiens]  
L-lactate dehydrogenase A chain isoform 3 [Homo sapiens]  
L-lactate dehydrogenase B chain isoform LDHBx [Homo sapiens]  
L-lactate dehydrogenase B chain isoform X1 [Homo sapiens]  
lactadherin isoform a preproprotein [Homo sapiens]  
lactotransferrin isoform 1 preproprotein [Homo sapiens]  
lamin isoform A [Homo sapiens]

leukocyte surface antigen CD47 isoform 1 precursor [Homo sapiens]  
lipopolysaccharide-binding protein precursor [Homo sapiens]  
lysozyme C precursor [Homo sapiens]  
major vault protein isoform 1 [Homo sapiens]  
malate dehydrogenase, mitochondrial isoform 1 precursor [Homo sapiens]  
mannan-binding lectin serine protease 1 isoform X1 [Homo sapiens]  
mannan-binding lectin serine protease 1 isoform X2 [Homo sapiens]  
mannan-binding lectin serine protease 2 isoform 1 preproprotein [Homo sapiens]  
mannose-binding protein C precursor [Homo sapiens]  
mesothelin isoform 1 preproprotein [Homo sapiens]  
mesothelin isoform 2 preproprotein [Homo sapiens]  
midkine isoform a precursor [Homo sapiens]  
mitotic checkpoint protein BUB3 isoform a [Homo sapiens]  
moesin isoform X1 [Homo sapiens]  
myeloperoxidase precursor [Homo sapiens]  
N-acetylmuramoyl-L-alanine amidase isoform 2 precursor [Homo sapiens]  
neutral amino acid transporter B(0) isoform 1 [Homo sapiens]  
nucleolin [Homo sapiens]  
nucleoside diphosphate kinase A isoform a [Homo sapiens]  
obg-like ATPase 1 isoform 1 [Homo sapiens]  
Parkinson disease protein 7 isoform X1 [Homo sapiens]  
pentraxin-related protein PTX3 precursor [Homo sapiens]  
peptidyl-prolyl cis-trans isomerase A isoform 1 [Homo sapiens]  
peroxiredoxin-1 [Homo sapiens]  
peroxiredoxin-2 [Homo sapiens]  
peroxiredoxin-6 [Homo sapiens]  
phosphatidylcholine-sterol acyltransferase precursor [Homo sapiens]  
phosphatidylinositol-glycan-specific phospholipase D isoform X1 [Homo sapiens]  
phosphoglucomutase-1 isoform 1 [Homo sapiens]  
phosphoglycerate kinase 1 [Homo sapiens]  
phosphoglycerate mutase 1 isoform 1 [Homo sapiens]  
phospholipid transfer protein isoform a precursor [Homo sapiens]  
plasma kallikrein isoform X1 [Homo sapiens]  
plasma kallikrein isoform X2 [Homo sapiens]  
plasma protease C1 inhibitor precursor [Homo sapiens]  
plasma serine protease inhibitor preproprotein [Homo sapiens]  
plasminogen isoform 1 precursor [Homo sapiens]  
platelet factor 4 isoform 2 [Homo sapiens]  
platelet-activating factor acetylhydrolase IB subunit beta isoform X1 [Homo sapiens]  
platelet-activating factor acetylhydrolase isoform X1 [Homo sapiens]  
poly(rC)-binding protein 1 [Homo sapiens]  
polyadenylate-binding protein 1 isoform X1 [Homo sapiens]  
prenylcysteine oxidase 1 precursor [Homo sapiens]  
procollagen-lysine,2-oxoglutarate 5-dioxygenase 1 isoform 1 precursor [Homo sapiens]  
profilin-1 isoform 2 [Homo sapiens]  
programmed cell death 6-interacting protein isoform 1 [Homo sapiens]  
programmed cell death 6-interacting protein isoform 2 [Homo sapiens]  
programmed cell death protein 6 isoform 1 [Homo sapiens]  
prolactin-inducible protein precursor [Homo sapiens]  
properdin precursor [Homo sapiens]  
prostaglandin F2 receptor negative regulator isoform X1 [Homo sapiens]  
proteasome subunit alpha type-5 isoform 1 [Homo sapiens]  
proteasome subunit alpha-type 8 isoform 1 [Homo sapiens]  
protein AMBP preproprotein [Homo sapiens]  
protein arginine N-methyltransferase 1 isoform 1 [Homo sapiens]  
protein disulfide-isomerase A3 precursor [Homo sapiens]  
protein NDRG1 isoform 1 [Homo sapiens]  
protein NDRG1 isoform 4 [Homo sapiens]  
protein RCC2 [Homo sapiens]  
protein S100-A10 [Homo sapiens]  
protein S100-A4 [Homo sapiens]  
protein S100-A7 [Homo sapiens]

protein-glutamine gamma-glutamyltransferase E [Homo sapiens]  
prothrombin preproprotein [Homo sapiens]  
purine nucleoside phosphorylase [Homo sapiens]  
putative V-set and immunoglobulin domain-containing-like protein IGHV4OR15-8 [Homo sapiens]  
pyruvate kinase PKM isoform X1 [Homo sapiens]  
rab GDP dissociation inhibitor beta isoform 1 [Homo sapiens]  
ras-related C3 botulinum toxin substrate 1 isoform Rac1b [Homo sapiens]  
ras-related protein Rab-13 isoform 1 [Homo sapiens]  
ras-related protein Rab-1A isoform 1 [Homo sapiens]  
ras-related protein Rab-1B [Homo sapiens]  
ras-related protein Rab-7a [Homo sapiens]  
ras-related protein Rab-8A [Homo sapiens]  
ras-related protein Rap-1b isoform 1 precursor [Homo sapiens]  
receptor of activated protein C kinase 1 [Homo sapiens]  
retinoic acid-induced protein 3 [Homo sapiens]  
retinol-binding protein 4 isoform a precursor [Homo sapiens]  
rho-related GTP-binding protein RhoC precursor [Homo sapiens]  
ruvB-like 1 isoform 1 [Homo sapiens]  
ruvB-like 2 isoform 1 [Homo sapiens]  
S-formylglutathione hydrolase isoform X1 [Homo sapiens]  
S-methyl-5'-thioadenosine phosphorylase isoform 6 [Homo sapiens]  
SAA2-SAA4 protein precursor [Homo sapiens]  
secretory carrier-associated membrane protein 3 isoform 1 [Homo sapiens]  
selenoprotein P isoform 2 [Homo sapiens]  
serine hydroxymethyltransferase, mitochondrial isoform 1 precursor [Homo sapiens]  
serine/threonine-protein phosphatase PP1-beta catalytic subunit isoform 1 [Homo sapiens]  
serotransferrin isoform 1 precursor [Homo sapiens]  
serpin H1 isoform X1 [Homo sapiens]  
serum amyloid A-1 protein preproprotein [Homo sapiens]  
serum amyloid A-2 protein isoform a preproprotein [Homo sapiens]  
serum amyloid P-component precursor [Homo sapiens]  
serum paraoxonase/arylesterase 1 precursor [Homo sapiens]  
serum paraoxonase/lactonase 3 [Homo sapiens]  
single-stranded DNA-binding protein, mitochondrial precursor [Homo sapiens]  
small nuclear ribonucleoprotein Sm D2 isoform 1 [Homo sapiens]  
sodium-dependent phosphate transport protein 2B isoform a [Homo sapiens]  
sodium/potassium-transporting ATPase subunit beta-3 [Homo sapiens]  
spliceosome RNA helicase DDX39B [Homo sapiens]  
sulfhydryl oxidase 1 isoform a precursor [Homo sapiens]  
synaptogyrin-2 isoform 3 [Homo sapiens]  
syntenin-1 isoform 7 [Homo sapiens]  
T-complex protein 1 subunit alpha isoform a [Homo sapiens]  
T-complex protein 1 subunit beta isoform 1 [Homo sapiens]  
T-complex protein 1 subunit delta isoform a [Homo sapiens]  
T-complex protein 1 subunit epsilon isoform a [Homo sapiens]  
T-complex protein 1 subunit eta isoform a [Homo sapiens]  
T-complex protein 1 subunit gamma isoform a [Homo sapiens]  
T-complex protein 1 subunit theta isoform 1 [Homo sapiens]  
T-complex protein 1 subunit zeta isoform a [Homo sapiens]  
testican-2 isoform 2 precursor [Homo sapiens]  
tetraspanin-14 isoform 1 [Homo sapiens]  
threonine--tRNA ligase 1, cytoplasmic isoform 2 [Homo sapiens]  
transcriptional activator protein Pur-alpha [Homo sapiens]  
transcriptional activator protein Pur-beta [Homo sapiens]  
transferrin receptor protein 1 isoform 1 [Homo sapiens]  
transforming growth factor-beta-induced protein ig-h3 precursor [Homo sapiens]  
transforming protein RhoA isoform 1 precursor [Homo sapiens]  
transgelin-2 isoform a [Homo sapiens]  
transitional endoplasmic reticulum ATPase isoform 1 [Homo sapiens]  
transketolase isoform X1 [Homo sapiens]  
transthyretin precursor [Homo sapiens]  
triosephosphate isomerase isoform 2 [Homo sapiens]

tropomyosin alpha-1 chain isoform X10 [Homo sapiens]  
tropomyosin alpha-3 chain isoform Tpm3.2cy [Homo sapiens]  
tubulin alpha-1A chain isoform 1 [Homo sapiens]  
tubulin alpha-1C chain isoform a [Homo sapiens]  
tubulin alpha-4A chain isoform X1 [Homo sapiens]  
tubulin beta chain isoform a [Homo sapiens]  
tubulin beta chain isoform b [Homo sapiens]  
tubulin beta-1 chain [Homo sapiens]  
tubulin beta-3 chain isoform 1 [Homo sapiens]  
tubulin beta-4A chain isoform 1 [Homo sapiens]  
tubulin beta-4B chain [Homo sapiens]  
tubulin beta-6 chain isoform 1 [Homo sapiens]  
tumor-associated calcium signal transducer 2 precursor [Homo sapiens]  
UDP-glucose 6-dehydrogenase isoform X1 [Homo sapiens]  
V-type proton ATPase catalytic subunit A isoform X1 [Homo sapiens]  
vacuolar protein sorting-associated protein 35 [Homo sapiens]  
vitamin D-binding protein isoform 3 precursor [Homo sapiens]  
vitamin K-dependent protein S isoform 1 precursor [Homo sapiens]  
vitronectin precursor [Homo sapiens]  
WD repeat-containing protein 1 isoform X1 [Homo sapiens]  
X-ray repair cross-complementing protein 5 [Homo sapiens]  
X-ray repair cross-complementing protein 6 isoform 1 [Homo sapiens]  
Y-box-binding protein 1 [Homo sapiens]  
zinc-alpha-2-glycoprotein precursor [Homo sapiens]  
zymogen granule protein 16 homolog B precursor [Homo sapiens]
